# Supplementary material for: International Clinical Practice Guidelines for Sarcopenia (ICFSR): Screening, Diagnosis and Management
Source: Springer Nature journal article supplement (doi:10.1007/s12603-018-1139-9), 2018-11-21
Supplement: MOESM1 [file 16288558]

**Appendix 1. Patient Information for Treatment of Sarcopenia (poor muscle function with low muscle mass)**

- Sarcopenia is recognized as an independent disease by the ICD 10 code (M62.84) allowing physicians to bill for its diagnosis and treatment.
- All persons over the age of 65 years should be screened for sarcopenia yearly with either a simple questionnaire, e.g., SARC-F (Strength, assistance in walking, rise from a chair, climb stairs and falls) or by measuring gait speed
- Definitive diagnosis can be made by following the recommendations of a number of international working groups. At present, this includes a DXA (dual-energy x-ray absorptiometry) scan to measure muscle mass. Persons of Asian origin should follow the recommendations of the Asian Working Group.
- Primary treatment is resistance-based (weights) training which can be initiated by a Physiotherapist or Exercise Physiologist. Long-term exercise therapy with an exercise coach would seem to be a prudent step following physical therapy.
- A protein supplement appears to be useful in persons doing physical activity.
